# Supplementary material for: Spatial Variation of Tetracycline-Resistant E. coli and Relationships with Water Quality Variables in Irrigation Water: A Pilot Study
Source: MDPI journal article supplement (doi:10.3390/applmicrobiol3020036), 2023-05-30
Supplement: s1 [file s1]

Supplemental Table S1. Concentrations of total coliform bacteria (MPN 100 mL<sup>-1</sup>) in unamended, low-tetracycline (4 µg mL<sup>-1</sup>), and high-tetracycline (16 µg mL<sup>-1</sup>) amended samples.

|          | 8/24/2022 |        |         | 9/1/2022 |        |         | 9/8/2022 |        |         | 9/29/2022 |        |         |
|----------|-----------|--------|---------|----------|--------|---------|----------|--------|---------|-----------|--------|---------|
| Location | No Tc     | Low Tc | High Tc | No Tc    | Low Tc | High Tc | No Tc    | Low Tc | High Tc | No Tc     | Low Tc | High Tc |
| 1        | 727       | N.M.   | 1       | 6498.5   | 24.2   | 5.2     | 12,098   | 133.8  | 20.2    | TNTC      | 6.2    | 2       |
| 1-2      | TNTC      | N.M.   | 1       | N.M.     | N.M.   | N.M.    | TNTC     | 105.4  | 33.6    | TNTC      | 6      | 1       |
| 2        | 1046.2    | N.M.   | 0       | 6498.5   | 17.2   | 2       | TNTC     | 107.6  | 67      | TNTC      | 6.2    | 2       |
| 2-2      | TNTC      | N.M.   | 7.4     | N.M.     | N.M.   | N.M.    | TNTC     | 146.6  | 39.9    | TNTC      | 8.2    | 1       |
| 3        | 1413.6    | N.M.   | 0       | 4082     | 24.2   | 3       | TNTC     | 135.4  | 65.7    | TNTC      | 2      | 2       |
| 3-2      | TNTC      | N.M.   | 0       | N.M.     | N.M.   | N.M.    | TNTC     | 236.4  | 93.4    | TNTC      | 4      | 1       |
| 4        | TNTC      | N.M.   | 0       | 7068     | 16.8   | 6.3     | TNTC     | 261.8  | 96      | TNTC      | 2      | 2       |
| 4-2      | 3629.4    | N.M.   | 1       | N.M.     | N.M.   | N.M.    | N.M.     | N.M.   | N.M.    | N.M.      | N.M.   | N.M.    |
| 5        | 1986.3    | N.M.   | 0       | 8664.5   | 17.2   | 4.1     | TNTC     | 144.8  | 29.5    | TNTC      | 2      | 2       |
| 5-2      | 1986.3    | N.M.   | 4.1     | N.M.     | N.M.   | N.M.    | N.M.     | N.M.   | N.M.    | TNTC      | 2      | 0       |
| 6        | 1413.6    | N.M.   | 0       | 8664.5   | 4      | 3       | TNTC     | 254.8  | 32.3    | TNTC      | 15     | 0       |
| 6-2      | 1732.9    | N.M.   | 0       | N.M.     | N.M.   | N.M.    | N.M.     | N.M.   | N.M.    | N.M.      | N.M.   | N.M.    |
| 7        | 1732.9    | N.M.   | 0       | 9931.5   | 8.2    | 5.2     | TNTC     | 174.2  | 14.6    | 9678.4    | 14.6   | 6.3     |
| 7-2      | 1986.3    | N.M.   | 0       | N.M.     | N.M.   | N.M.    | N.M.     | N.M.   | N.M.    | TNTC      | 10.4   | 3       |
| 8        | 1986.3    | N.M.   | 0       | 7765.5   | 17     | 4.1     | TNTC     | 170.4  | 21.8    | TNTC      | 3.1    | 0       |
| 8-2      | TNTC      | N.M.   | 0       | N.M.     | N.M.   | N.M.    | N.M.     | N.M.   | N.M.    | 9678.4    | 6.2    | 4.1     |
| 9        | 1553.1    | N.M.   | 0       | 12,098   | 32     | 1       | TNTC     | 296.6  | 88      | TNTC      | 3.1    | 2       |
| 9-2      | TNTC      | N.M.   | N.M.    | N.M.     | N.M.   | N.M.    | N.M.     | N.M.   | N.M.    | TNTC      | 8.2    | 2       |
| 10       | TNTC      | N.M.   | 0       | 5599.5   | 10.4   | 6.3     | TNTC     | 113.4  | 4.1     | TNTC      | 10.4   | 0       |
| 10-2     | 1119.9    | N.M.   | 0       | N.M.     | N.M.   | N.M.    | TNTC     | 218    | 58.3    | TNTC      | 21.6   | 0       |

TNTC = too numerous to count, N.M. = not measured.
