# Supplementary material for: Spatial Variation of Tetracycline-Resistant E. coli and Relationships with Water Quality Variables in Irrigation Water: A Pilot Study
Source: MDPI journal article supplement (doi:10.3390/applmicrobiol3020036), 2023-05-30
Supplement: s1 [file s1]

Supplemental Table S2. Averages and standard errors of *E. coli* concentrations, percentages of tetracycline resistant *E. coli*, and water quality variables measured across the entire study.

|                   | 6/9/2023       |                | 6/29/2023      |                | 8/24/2023      |                | 9/1/2023       |       | 9/8/2023         |                  | 9/29/2023      |                |
|-------------------|----------------|----------------|----------------|----------------|----------------|----------------|----------------|-------|------------------|------------------|----------------|----------------|
|                   | Surface        | Depth          | Surface        | Depth          | Surface        | Depth          | Surface        | Depth | Surface          | Depth            | Surface        | Depth          |
| EC                | 412.60 ± 39.92 | 353.80 ± 38.35 | 91.24 ± 22.92  | 80.60 ± 13.97  | 50.02 ± 20.63  | 82.00 ± 21.79  | 666.35 ± 85.28 | N.M.  | 1557.45 ± 336.21 | 1849.13 ± 277.73 | 78.00 ± 11.40  | 91.81 ± 12.91  |
| MPN <sub>Lt</sub> | N.M.           | N.M.           | N.M.           | N.M.           | N.M.           | N.M.           | 9.42 ± 1.46    | N.M.  | 62.86 ± 18.03    | 89.85 ± 24.39    | 3.35 ± 0.82    | 3.86 ± 0.81    |
| MPN <sub>Ht</sub> | N.M.           | N.M.           | N.M.           | N.M.           | B.D.L          | 1.16 ± 0.73    | 2.04 ± 0.49    | N.M.  | 34.73 ± 9.58     | 43.08 ± 15.78    | 1.54 ± 0.63    | 1.51 ± 0.43    |
| Low %             | N.M.           | N.M.           | N.M.           | N.M.           | N.M.           | N.M.           | 1.49 ± 0.24    | N.M.  | 4.01 ± 0.82      | 5.23 ± 1.67      | 4.79 ± 1.31    | 4.16 ± 1.03    |
| High %            | N.M.           | N.M.           | N.M.           | N.M.           | B.D.L          | 1.09 ± 0.64    | 0.35 ± 0.12    | N.M.  | 2.01 ± 0.40      | 2.34 ± 0.72      | 2.23 ± 0.80    | 1.63 ± 0.49    |
| C                 | 25.07 ± 0.14   | 24.15 ± 0.32   | 25.63 ± 0.22   | 25.82 ± 0.15   | 26.42 ± 0.07   | 25.53 ± 0.18   | 25.78 ± 0.05   | N.M.  | 23.64 ± 0.03     | 22.90 ± 0.57     | 17.38 ± 0.04   | 17.14 ± 0.13   |
| DO                | 8.68 ± 0.08    | 8.87 ± 0.43    | 10.17 ± 0.24   | 9.33 ± 0.10    | 7.31 ± 0.21    | 4.95 ± 0.36    | 6.03 ± 0.21    | N.M.  | 7.09 ± 0.22      | 5.58 ± 0.51      | 9.22 ± 0.04    | 9.17 ± 0.05    |
| SPC               | 151.74 ± 0.52  | 149.90 ± 1.52  | 181.88 ± 0.47  | 184.29 ± 1.72  | 175.58 ± 0.39  | 176.40 ± 0.60  | 165.00 ± 0.13  | N.M.  | 158.77 ± 0.32    | 160.68 ± 2.01    | 178.98 ± 0.18  | 179.00 ± 0.21  |
| pH                | 8.72 ± 0.04    | 8.50 ± 0.16    | 8.21 ± 0.05    | 7.76 ± 0.11    | 7.18 ± 0.09    | 6.72 ± 0.06    | 7.53 ± 0.05    | N.M.  | 7.43 ± 0.06      | 7.09 ± 0.14      | 7.83 ± 0.04    | 7.78 ± 0.06    |
| NTU               | 2.24 ± 0.16    | 4.47 ± 1.21    | 6.14 ± 0.46    | 5.47 ± 0.20    | 14.68 ± 0.28   | 15.57 ± 1.45   | 19.49 ± 0.32   | N.M.  | 19.37 ± 0.58     | 19.31 ± 2.54     | 11.05 ± 0.43   | 11.43 ± 0.76   |
| BGA               | 0.38 ± 0.02    | 0.80 ± 0.16    | 0.66 ± 0.12    | 0.47 ± 0.03    | 2.87 ± 0.12    | 2.88 ± 0.29    | 3.64 ± 0.03    | N.M.  | 4.17 ± 0.08      | 4.25 ± 0.36      | 1.86 ± 0.13    | 2.62 ± 0.16    |
| CHL               | 1.70 ± 0.16    | 4.64 ± 2.05    | 1.44 ± 0.47    | 1.07 ± 0.12    | 4.51 ± 0.13    | 4.69 ± 0.40    | 13.13 ± 0.46   | N.M.  | 26.91 ± 0.67     | 29.00 ± 2.00     | 10.29 ± 1.23   | 18.43 ± 1.06   |
| FDOM              | 33.30 ± 0.32   | 35.91 ± 1.54   | 26.50 ± 0.35   | 27.02 ± 0.37   | 29.97 ± 0.09   | 28.96 ± 0.47   | 28.74 ± 0.14   | N.M.  | 37.14 ± 0.26     | 35.24 ± 1.13     | 29.82 ± 0.40   | 29.67 ± 0.62   |
| PHYC              | 39.57 ± 2.81   | 40.82 ± 1.90   | 49.30 ± 1.47   | 53.86 ± 3.49   | 103.99 ± 4.56  | 93.64 ± 3.59   | 121.61 ± 1.56  | N.M.  | 110.69 ± 2.36    | 102.03 ± 12.14   | 81.99 ± 1.74   | 80.30 ± 3.96   |
| INV               | 180.66 ± 9.00  | 241.92 ± 44.37 | 101.65 ± 6.20  | 113.71 ± 10.68 | 338.07 ± 13.69 | 387.94 ± 21.09 | 832.75 ± 88.80 | N.M.  | 1797.50 ± 44.17  | 1885.00 ± 227.42 | 740.49 ± 29.40 | 709.38 ± 20.81 |
| CDOM              | 57.11 ± 0.60   | 65.64 ± 2.86   | 43.58 ± 0.38   | 47.17 ± 1.46   | 69.70 ± 0.71   | 69.36 ± 1.57   | 103.26 ± 0.68  | N.M.  | 149.40 ± 1.29    | 134.23 ± 13.05   | 102.04 ± 2.56  | 99.01 ± 3.96   |
| NH3               | N.M.           | N.M.           | 0.08 ± 0.01    | 0.07 ± 0.01    | 0.27 ± 0.03    | 0.30 ± 0.03    | 0.18 ± 0.01    | N.M.  | 0.19 ± 0.01      | 0.24 ± 0.04      | 0.05 ± 0.01    | 0.05 ± 0.00    |
| NO3               | N.M.           | N.M.           | 0.44 ± 0.02    | 0.47 ± 0.02    | 0.14 ± 0.02    | 0.16 ± 0.02    | 0.12 ± 0.01    | N.M.  | 0.32 ± 0.03      | 0.51 ± 0.20      | 0.43 ± 0.01    | 0.43 ± 0.01    |
| PO4               | N.M.           | N.M.           | 0.02 ± 0.00    | 0.02 ± 0.00    | 0.02 ± 0.00    | 0.02 ± 0.00    | 0.02 ± 0.00    | N.M.  | 0.02 ± 0.00      | 0.02 ± 0.00      | 0.05 ± 0.04    | 0.01 ± 0.00    |
| TC                | N.M.           | N.M.           | 11.47 ± 0.21   | 11.13 ± 0.11   | 13.81 ± 0.16   | 13.89 ± 0.34   | 13.02 ± 0.27   | N.M.  | 12.07 ± 0.09     | 11.11 ± 0.33     | 10.93 ± 0.13   | 11.04 ± 0.22   |
| IC                | N.M.           | N.M.           | 6.25 ± 0.05    | 6.22 ± 0.08    | 7.24 ± 0.06    | 7.27 ± 0.14    | 6.43 ± 0.16    | N.M.  | 6.20 ± 0.06      | 5.83 ± 0.16      | 6.11 ± 0.06    | 6.17 ± 0.12    |
| TN                | N.M.           | N.M.           | 1.27 ± 0.05    | 1.36 ± 0.03    | 1.33 ± 0.04    | 1.52 ± 0.06    | 1.15 ± 0.03    | N.M.  | 1.35 ± 0.04      | 1.53 ± 0.16      | 1.32 ± 0.07    | 1.31 ± 0.10    |
| NN                | N.M.           | N.M.           | 0.47 ± 0.05    | 0.49 ± 0.05    | 0.26 ± 0.01    | 0.32 ± 0.08    | 0.25 ± 0.01    | N.M.  | 0.44 ± 0.02      | 0.66 ± 0.22      | 0.54 ± 0.07    | 0.57 ± 0.09    |
| TOC               | N.M.           | N.M.           | 5.22 ± 0.20    | 4.91 ± 0.05    | 6.57 ± 0.13    | 6.62 ± 0.24    | 6.59 ± 0.14    | N.M.  | 5.87 ± 0.08      | 5.28 ± 0.23      | 4.82 ± 0.08    | 4.87 ± 0.13    |
| PAR               | 355.30 ± 71.53 | 97.22 ± 22.85  | 700.65 ± 6.41  | 205.75 ± 9.04  | 474.48 ± 11.70 | 77.03 ± 4.73   | 516.04 ± 10.93 | N.M.  | 333.78 ± 40.21   | 24.62 ± 5.45     | 504.78 ± 28.87 | 75.76 ± 8.68   |
| TSR               | N.M.           | N.M.           | 948.11 ± 14.64 | 195.22 ± 15.98 | 650.80 ± 19.75 | 79.89 ± 8.61   | 705.30 ± 15.79 | N.M.  | 440.20 ± 39.69   | 37.25 ± 9.90     | 717.60 ± 26.00 | 97.63 ± 12.35  |

N.M. = not measured, B.D.L. = below detection limit, N.A. = not available. EC = concentration of *E. coli* in unamended samples (MPN 100 mL<sup>-1</sup>), MPN<sub>Lt</sub> = concentrations of *E. coli* in low dose tetracycline amended samples (MPN 100 mL<sup>-1</sup>), MPN<sub>Ht</sub> = concentrations of *E. coli* in high dose tetracycline amended samples (MPN 100 mL<sup>-1</sup>), Low % = percentage of low dose tetracycline concentration to total *E. coli* population (%), High % = percentage of high dose tetracycline concentration to total *E. coli* population (%), C = water temperature (°C), DO = dissolved oxygen (mg L<sup>-1</sup>), SPC = specific conductivity (μS cm<sup>-1</sup>), NTU = turbidity (NTU), BGA = phycocyanin (RFU), CHL = chlorophyll-a (RFU), FDOM = fluorescent dissolved organic matter (μg L<sup>-1</sup>), PHYC = phycocyanin laboratory (?), INV = laboratory chlorophyll (RFU), CDOM = colored dissolved organic matter (μg L<sup>-1</sup>), NH<sub>3</sub> = ammonia (mg L<sup>-1</sup>), NO<sub>3</sub> = nitrate (mg L<sup>-1</sup>), PO<sub>4</sub> = orthophosphate (mg L<sup>-1</sup>), TC = total carbon (mg L<sup>-1</sup>), TIC = inorganic carbon (mg L<sup>-1</sup>), TN = total nitrogen (mg L<sup>-1</sup>), NN = nitrate nitrogen (mg L<sup>-1</sup>), TOC = organic carbon (mg L<sup>-1</sup>), PAR = photosynthetic active radiation (W m<sup>-2</sup>), TSR = total solar radiation (W m<sup>-2</sup>).
