# Supplementary material for: Spatial Variation of Tetracycline-Resistant E. coli and Relationships with Water Quality Variables in Irrigation Water: A Pilot Study
Source: MDPI journal article supplement (doi:10.3390/applmicrobiol3020036), 2023-05-30
Supplement: s1 [file s1]

Supplemental Table S3. Spearman correlation coefficients ( $r_s$ ) between *E. coli* concentrations or ratios and measured water quality variables. Relationship strengths are indicated as positive and negative with green and red gradations, respectively. Cell colors depict the direction of the relationship with green and red cells indicating positive and negative values, respectively. Weak correlations are shown in yellow. The strength of the relationship determines the intensity of the coloring.

|                 | No<br>Tetracycline          | Low<br>Tetracycline         | High<br>Tetracycline        | Percentage<br>Low | Percentage<br>High |
|-----------------|-----------------------------|-----------------------------|-----------------------------|-------------------|--------------------|
| Variable        | MPN 100<br>mL <sup>-1</sup> | MPN 100<br>mL <sup>-1</sup> | MPN 100<br>mL <sup>-1</sup> | %                 | %                  |
| C               | -0.283                      | 0.492                       | -0.324                      | -0.280            | -0.497             |
| DO              | -0.372                      | -0.653                      | -0.198                      | 0.182             | 0.046              |
| SPC             | -0.658                      | -0.808                      | -0.541                      | -0.093            | -0.171             |
| pH              | 0.072                       | -0.684                      | 0.074                       | 0.086             | 0.207              |
| NTU             | 0.386                       | 0.701                       | 0.390                       | -0.179            | 0.031              |
| BGA             | 0.437                       | 0.808                       | 0.536                       | 0.013             | 0.200              |
| CHL             | 0.512                       | 0.685                       | 0.760                       | 0.267             | 0.596              |
| FDOM            | 0.516                       | 0.620                       | 0.524                       | 0.544             | 0.476              |
| PHYC            | 0.256                       | 0.465                       | 0.205                       | -0.368            | -0.125             |
| INV             | 0.508                       | 0.778                       | 0.808                       | 0.041             | 0.576              |
| CDOM            | 0.507                       | 0.545                       | 0.699                       | 0.154             | 0.547              |
| NH <sub>3</sub> | 0.208                       | 0.790                       | -0.033                      | -0.054            | -0.217             |
| NO <sub>3</sub> | -0.121                      | -0.270                      | 0.291                       | 0.459             | 0.462              |
| PO <sub>4</sub> | 0.051                       | 0.326                       | 0.092                       | 0.052             | 0.005              |
| TC              | 0.007                       | 0.440                       | -0.262                      | -0.234            | -0.386             |
| TIC             | -0.300                      | -0.113                      | -0.378                      | -0.029            | -0.298             |

|     |        |              |              |              |              |
|-----|--------|--------------|--------------|--------------|--------------|
| TN  | -0.193 | 0.203        | -0.033       | 0.302        | 0.002        |
| NN  | -0.080 | -0.248       | <b>0.277</b> | <b>0.326</b> | <b>0.417</b> |
| TOC | 0.073  | <b>0.478</b> | -0.213       | -0.255       | -0.392       |
| PAR | -0.103 | -0.292       | -0.180       | -0.239       | -0.182       |
| TSR | -0.086 | -0.261       | -0.208       | -0.240       | -0.217       |

C = water temperature (°C), DO = dissolved oxygen (mg L<sup>-1</sup>), SPC = specific conductivity (µS cm<sup>-1</sup>), NTU = turbidity (NTU), BGA = phycocyanin (RFU), CHL = chlorophyll-a (RFU), FDOM = fluorescent dissolved organic matter (µg L<sup>-1</sup>), PHYC = phycocyanin laboratory (µg L<sup>-1</sup>), INV = laboratory chlorophyll (RFU), CDOM = colored dissolved organic matter (µg L<sup>-1</sup>), NH3 = ammonia (mg L<sup>-1</sup>), NO3 = nitrate (mg L<sup>-1</sup>), PO4 = orthophosphate (mg L<sup>-1</sup>), TC = total carbon (mg L<sup>-1</sup>), TIC = inorganic carbon (mg L<sup>-1</sup>), TN = total nitrogen (mg L<sup>-1</sup>), NN = nitrate nitrogen (mg L<sup>-1</sup>), TOC = organic carbon (mg L<sup>-1</sup>), PAR = photosynthetic active radiation (W m<sup>-2</sup>), TSR = total solar radiation (W m<sup>-2</sup>). Values in bold indicate significant relationships at the  $p = 0.05$  level of probability. Values in bold indicate statistical significance at the  $\alpha = 0.05$  level.
