# Supplementary material for: Spatial Variation of Tetracycline-Resistant E. coli and Relationships with Water Quality Variables in Irrigation Water: A Pilot Study
Source: MDPI journal article supplement (doi:10.3390/applmicrobiol3020036), 2023-05-30
Supplement: s1 [file s1]

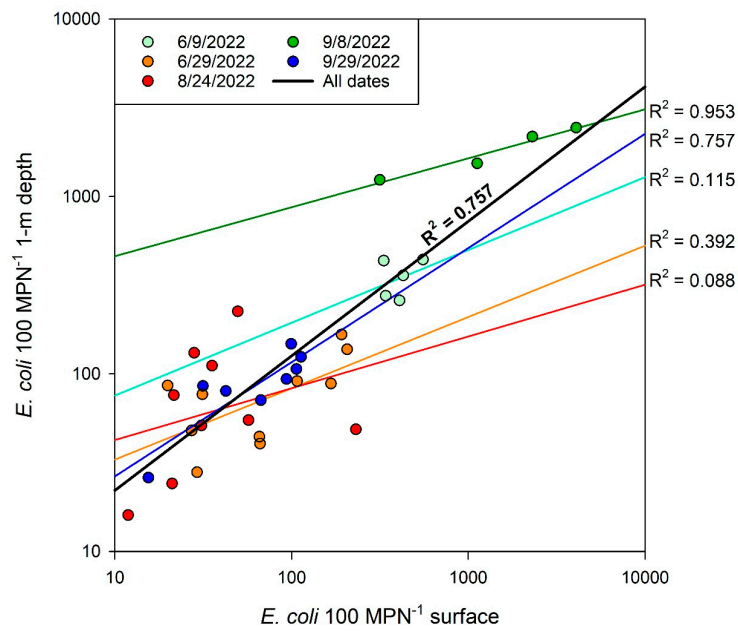

**Supplemental Figure S1.** Results of the linear regression analysis between concentrations of *E. coli* measured in surface and subsurface samples by date. The black line and bold  $R^2$  value show the result from pooling all dates together.

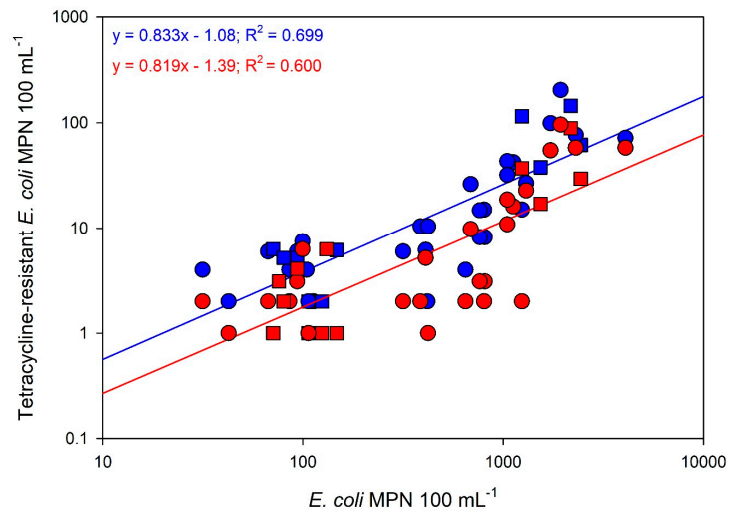

**Supplemental Figure S2.** Linear regressions between the logarithms of total *E. coli* population and the low (blue) and high (red) tetracycline-resistant *E. coli* populations. Circles and squares indicate samples taken at the water surface and sub-surface, respectively.

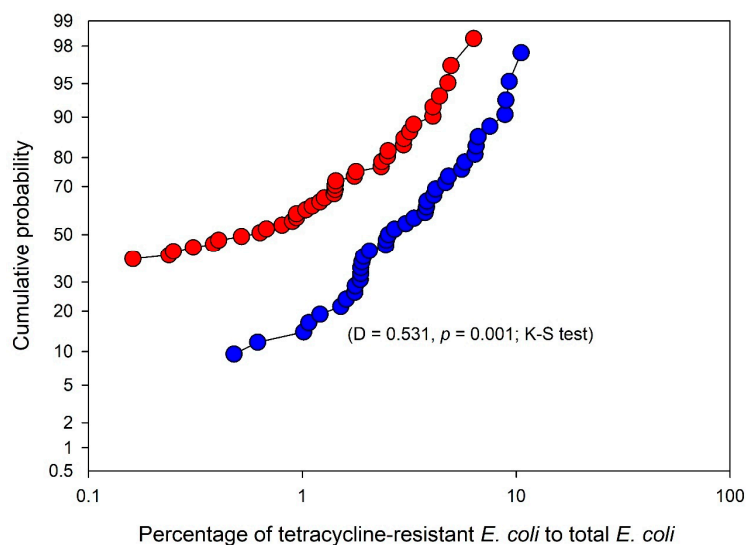

**Supplemental Figure S3.** Cumulative probability distributions of tetracycline-resistant *E. coli*. Blue and red colors indicate *E. coli* resistant to the low and high doses, respectively.

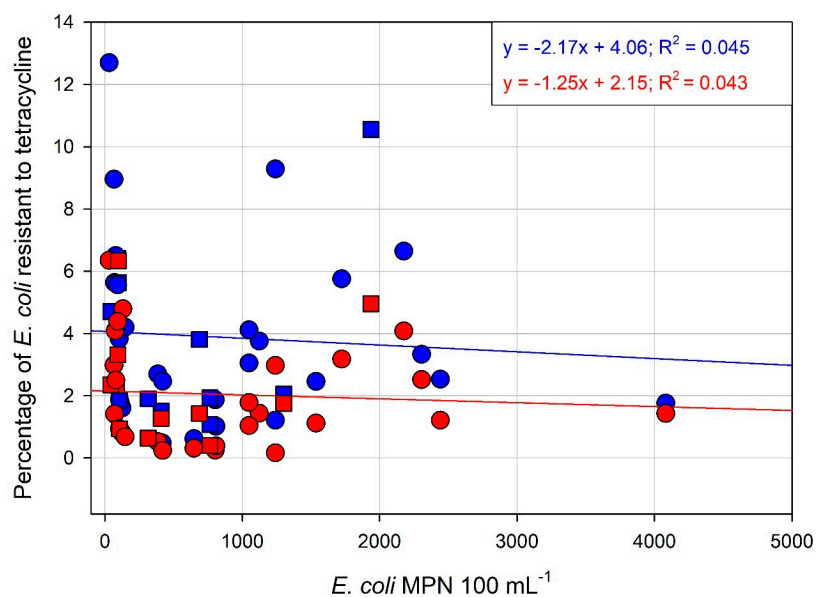

**Supplemental Figure S4.** Linear regressions of the concentration of *E. coli* in water samples plotted against the ratio of tetracycline-resistant *E. coli* at the low (blue) and high (red) doses. Circles and squares indicate samples taken at the water surface and subsurface, respectively.

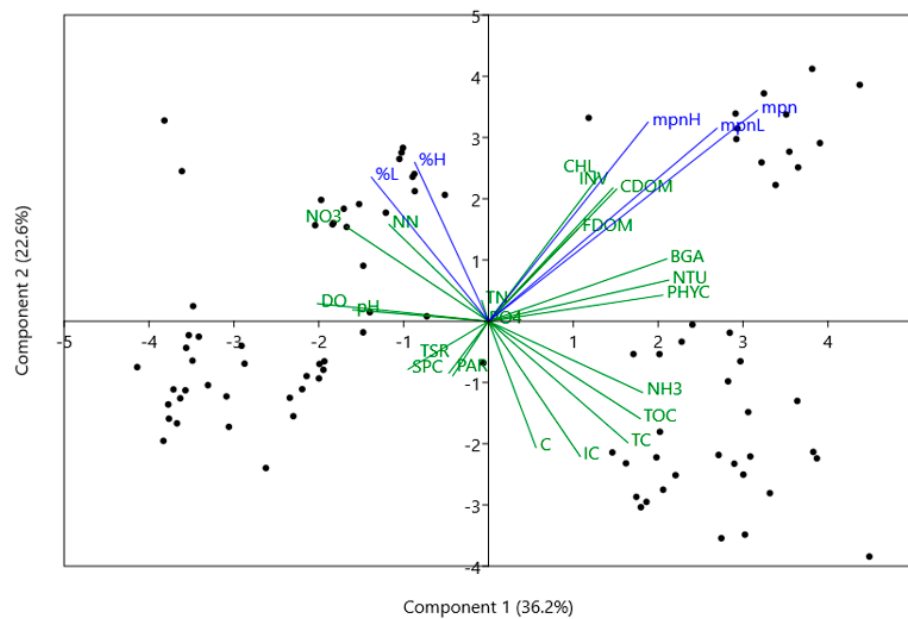

**Supplemental Figure S5.** Scattergram created from performing a principal component analysis on the tetracycline-resistant *E. coli* dataset. mpn = concentration of *E. coli* in unamended samples (MPN 100 mL<sup>-1</sup>), mpnL = concentrations of *E. coli* in low dose tetracycline amended samples (MPN 100 mL<sup>-1</sup>), mpnH = concentrations of *E. coli* in high dose tetracycline amended samples (MPN 100 mL<sup>-1</sup>), %L = percentage of low dose tetracycline concentration to total *E. coli* population (%), %H = percentage of high dose tetracycline concentration to total *E. coli* population (%), C = water temperature (°C), DO = dissolved oxygen (mg L<sup>-1</sup>), SPC = specific conductivity (μS cm<sup>-1</sup>), NTU = turbidity (NTU), BGA = phycocyanin (RFU), CHL = chlorophyll-a (RFU), FDOM = fluorescent dissolved organic matter (μg L<sup>-1</sup>), PHYC = phycocyanin laboratory (μg L<sup>-1</sup>), INV = laboratory chlorophyll (RFU), CDOM = colored dissolved organic matter (μg L<sup>-1</sup>), NH3 = ammonia (mg L<sup>-1</sup>), NO3 = nitrate (mg L<sup>-1</sup>), PO4 = orthophosphate (mg L<sup>-1</sup>), TC = total carbon (mg L<sup>-1</sup>), TIC = inorganic carbon (mg L<sup>-1</sup>), TN = total nitrogen (mg L<sup>-1</sup>), NN = nitrate nitrogen (mg L<sup>-1</sup>), TOC = organic carbon (mg L<sup>-1</sup>), PAR = photosynthetic active radiation (W m<sup>-2</sup>), TSR = total solar radiation (W m<sup>-2</sup>).

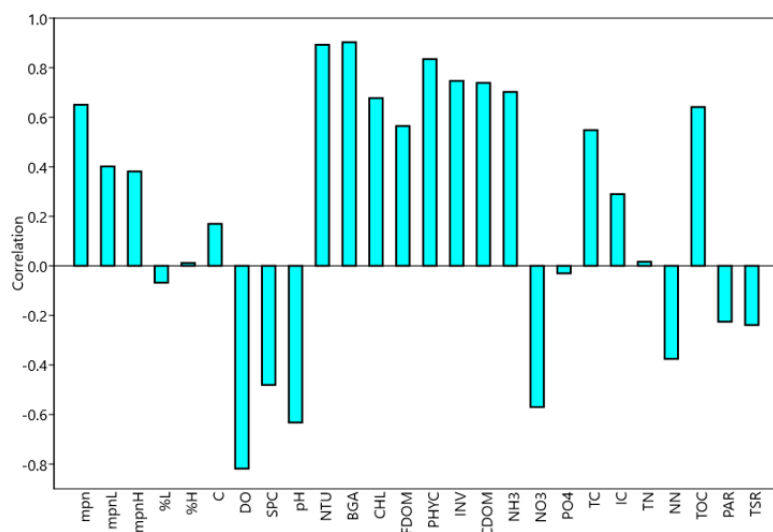

**Supplemental Figure S6.** Loadings plot of PC1 from the principal component analysis. mpn = concentration of *E. coli* in unamended samples (MPN 100 mL<sup>-1</sup>), mpnL = concentrations of *E. coli* in low dose tetracycline amended samples (MPN 100 mL<sup>-1</sup>), mpnH = concentrations of *E. coli* in high dose tetracycline amended samples (MPN 100 mL<sup>-1</sup>), %L = percentage of low dose tetracycline concentration to total *E. coli* population (%), %H = percentage of high dose tetracycline concentration to total *E. coli* population (%), C = water temperature (°C), DO = dissolved oxygen (mg L<sup>-1</sup>), SPC = specific conductivity (μS cm<sup>-1</sup>), NTU = turbidity (NTU), BGA = phycocyanin (RFU), CHL = chlorophyll-a (RFU), FDOM = fluorescent dissolved organic matter (μg L<sup>-1</sup>), PHYC = phycocyanin laboratory (μg L<sup>-1</sup>), INV = laboratory chlorophyll (RFU), CDOM = colored dissolved organic matter (μg L<sup>-1</sup>), NH<sub>3</sub> = ammonia (mg L<sup>-1</sup>), NO<sub>3</sub> = nitrate (mg L<sup>-1</sup>), PO<sub>4</sub> = orthophosphate (mg L<sup>-1</sup>), TC = total carbon (mg L<sup>-1</sup>), TIC = inorganic carbon (mg L<sup>-1</sup>), TN = total nitrogen (mg L<sup>-1</sup>), NN = nitrate nitrogen (mg L<sup>-1</sup>), TOC = organic carbon (mg L<sup>-1</sup>), PAR = photosynthetic active radiation (W m<sup>-2</sup>), TSR = total solar radiation (W m<sup>-2</sup>).
